# Supplementary material for: Translation Landscape of Stress Granules
Source: Research Square preprint supplement (doi:10.21203/rs.3.rs-4497528/v1), 2024-06-12
Supplement: Supplementary file 1 [file 3ea208b6a98a75175fdb296e.docx]

**Supplementary Video 1**

This supplementary video depicts the dynamics of stress granule formation in HeLa-G3BP1 cells treated with sodium arsenite. Imaging was performed at 2-minute intervals for one hour, commencing 6 minutes post-treatment. The video clearly demonstrates that stress granules begin to form at approximately 10 minutes, progressively growing to micrometer sizes by the end of the observation period.

**Supplementary Video 2**

This supplementary video illustrates the process of stress granule dissolution in HeLa-G3BP1 cells following the removal of sodium arsenite. Imaging commenced 6 minutes after drug withdrawal and was conducted at 2-minute intervals for a total duration of 6.5 hours. The video shows a gradual decrease in stress granule size, with most granules disappearing within 2 to 3 hours.
